# Supplementary material for: Rate constants for the gas-phase reactions of OH radicals with E-7-tetradecene, 2-methyl-1-tridecene and the C7–C14 1-alkenes at 295 ± 1 K
Source: Royal Society of Chemistry journal article supplement (doi:10.1039/b803527j), 2008-01-01
Supplement: b803527j.pdf [file b803527j.pdf]

**RATE CONSTANTS FOR THE GAS-PHASE REACTIONS OF OH RADICALS WITH  
*E*-7-TETRADECENE, 2-METHYL-1-TRIDECENE AND THE C<sub>7</sub>-C<sub>14</sub> 1-ALKENES  
AT 295 ± 1 K**

**Supplementary Material**

Sara M. Aschmann and Roger Atkinson<sup>\*</sup>

Air Pollution Research Center

University of California

Riverside, CA 92521

For the alkenes studied here, the estimation method of Kwok and Atkinson<sup>1</sup> treats OH radical addition to C=C bonds and H-atom abstraction from CH<sub>2</sub> and CH<sub>3</sub> groups as separate, additive processes. H-atom abstraction from vinylic C-H bonds is assumed to be negligible. Rate constants for OH radical addition to RCH=CH<sub>2</sub>, RR'C=CH<sub>2</sub>, Z- RCH=CHR' and E- RCH=CHR' systems (R, R' = alkyl) are taken to be equal to those for the reactions of OH radicals with propene, 2-methylpropene, Z-2-butene and E-2-butene, respectively, with rate constants at 298 K of  $k_{\text{add}}$  (in units of  $10^{-12} \text{ cm}^3 \text{ molecule}^{-1} \text{ s}^{-1}$ ) of 26.3, 51.4, 56.1 and 64.0, respectively.<sup>1</sup> H-atom abstraction from CH<sub>2</sub> and CH<sub>3</sub> groups is calculated using rate constants  $k_{\text{sec}}$  and  $k_{\text{prim}}$ , respectively, combined with substituent group factors,  $F(X)$ . H atom abstraction from a CH<sub>3</sub> group bonded to group X is given by  $k_{\text{abstr}}(\text{CH}_3\text{-X}) = k_{\text{prim}}F(X)$ , and from a CH<sub>2</sub> group bonded to groups X and Y is given by  $k_{\text{abstr}}(\text{X-CH}_2\text{-Y}) = k_{\text{sec}}F(X)F(Y)$ , where the values of  $k_{\text{prim}}$  and  $k_{\text{sec}}$  and the group substituent factors  $F(X)$  and  $F(Y)$  were derived from the kinetic data for alkanes.<sup>1</sup> At 298 K,  $k_{\text{prim}} = 1.36 \times 10^{-13} \text{ cm}^3 \text{ molecule}^{-1} \text{ s}^{-1}$ ,  $k_{\text{sec}} = 9.34 \times 10^{-13} \text{ cm}^3 \text{ molecule}^{-1} \text{ s}^{-1}$ ,  $F(\text{CH}_3) = 1.00$  (by definition),  $F(\text{CH}_2) = 1.23$ , and  $F(>\text{C}=\text{C}<) \sim 1.0$ .<sup>1</sup> As an example, the rate constant for the reaction of OH radicals with 1-decene, CH<sub>2</sub>=CHCH<sub>2</sub>CH<sub>2</sub>CH<sub>2</sub>CH<sub>2</sub>CH<sub>2</sub>CH<sub>2</sub>CH<sub>2</sub>CH<sub>3</sub>, is given by  $k_{\text{total}} = k_{\text{addition}} + k_{\text{abstraction}} = k_{\text{add}}(\text{RCH}=\text{CH}_2) + k_{\text{sec}}F(>\text{C}=\text{C}<)F(\text{CH}_2) + 5k_{\text{sec}}F(\text{CH}_2)F(\text{CH}_2) + k_{\text{sec}}F(\text{CH}_2)F(\text{CH}_3) + k_{\text{prim}}F(\text{CH}_2) = \{26.3 + (0.934 \times 1.0 \times 1.23) + (5 \times 0.934 \times 1.23 \times 1.23) + (0.934 \times 1.0 \times 1.23) + (0.136 \times 1.23)\} \times 10^{-12} = 35.8 \times 10^{-12} \text{ cm}^3 \text{ molecule}^{-1} \text{ s}^{-1}$  at 298 K.

## References

- (1) E. S. C. Kwok and R. Atkinson, *Atmos. Environ.*, 1995, **29**, 1685-1695.
